# Supplementary material for: Role of regulatory T cells in acute myeloid leukemia patients undergoing relapse-preventive immunotherapy
Source: Springer Nature journal article supplement (doi:10.1007/s00262-017-2040-9), 2017-07-18
Supplement: MOESM1 [file 13308836]

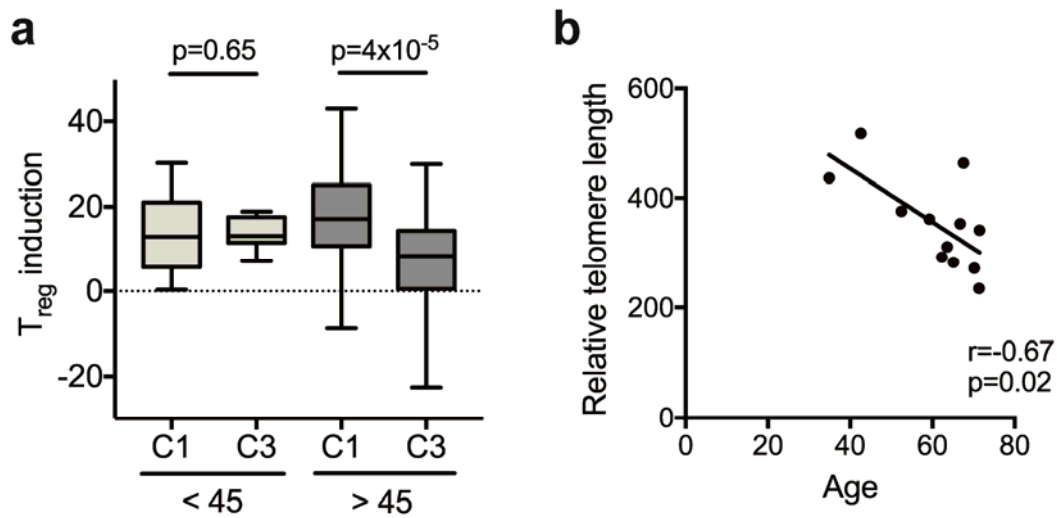

**Supplementary figure 1. Older patients have shorter  $T_{reg}$  telomeres and reduced capacity to expand  $T_{regs}$  in later HDC/IL-2 treatment cycles. (a)** Induction of  $T_{regs}$  (percentage out of  $CD4^+$  cells) during cycle 1 (C1; C1D21-C1D1) and cycle 3 (C3; C3D21-C3D1) of HDC/IL-2 immunotherapy in trial patients below and above 45 years of age ( $< 45$ : C1 n=9, C3 n=9;  $>45$ : C1 n=44, C3 n=39). The induction of  $T_{regs}$  during the two cycles was compared using Student's paired t-test. **(b)** Illustration of the correlation (Pearson's  $r$ ) between relative  $T_{reg}$  telomere length on C3D21 and age of the assayed patients (n=12).

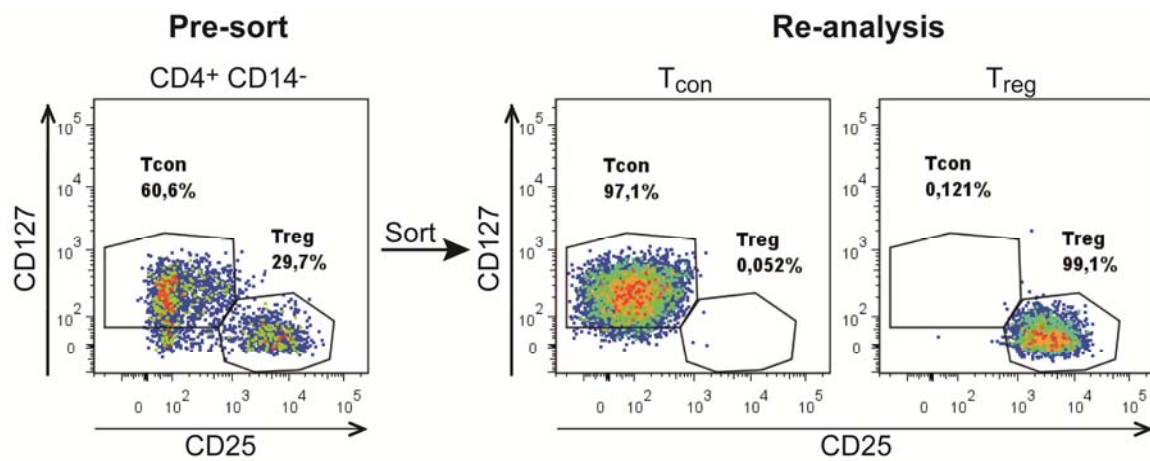

**Supplementary figure 2. Gating strategy for sort of T<sub>regs</sub> and T<sub>cons</sub>.** CD4<sup>+</sup>CD14<sup>-</sup> cells were further gated on CD25 and CD127 to distinguish T<sub>cons</sub> (CD25<sup>low</sup>CD127<sup>high</sup>) from T<sub>regs</sub> (CD25<sup>high</sup>CD127<sup>low</sup>). The left dot plot shows a sample before sorting. The purity of sorted populations was determined by re-analysis of sorted samples (dot plots to the right).
